# Supplementary material for: Robust generation of erythroid and multilineage hematopoietic progenitors from human iPSCs using a scalable monolayer culture system
Source: PubMed Central journal article supplement — Stem Cell Res. Author manuscript; Available in PMC 2020 Jan 10. (PMC6953424; doi:10.1016/j.scr.2019.101600), 2019-10-15
Supplement: NIHMS1546166-supplement-1.pdf [file NIHMS1546166-supplement-1.pdf]

# Supplementary Materials

## **Robust generation of erythroid and multilineage hematopoietic progenitors from human iPSCs using a scalable monolayer culture system**

Juan Pablo Ruiz<sup>a</sup>, Guibin Chen<sup>b</sup>, Juan Jesus Haro Mora<sup>a</sup>, Keyvan Keyvanfar<sup>c</sup>,  
Chengyu Liu<sup>d</sup>, Jizhong Zou<sup>e</sup>, Jeanette Beers<sup>e</sup>, Hanan Bloomer<sup>a</sup>, Husam Qanash<sup>a,f,g</sup>  
Naoya Uchida<sup>a</sup>, John F. Tisdale<sup>a</sup>, Manfred Boehm<sup>b</sup>, Andre Larochelle<sup>a\*</sup>

### **Affiliations:**

<sup>a</sup>Cellular and Molecular Therapeutics Branch, National Heart, Lung and Blood Institute (NHLBI),  
National Institutes of Health (NIH), Bethesda, MD 20892, USA.

<sup>b</sup>Translational Vascular Medicine Branch, NHLBI, NIH, Bethesda, MD 20892, USA.

<sup>c</sup>Clinical Flow Core Facility, NHLBI, NIH, Bethesda, MD 20892, USA.

<sup>d</sup>Transgenic Core Facility, NHLBI, NIH, Bethesda, MD 20892, USA.

<sup>e</sup>iPSC Core Facility, NHLBI, NIH, Bethesda, MD 20892, USA.

<sup>f</sup>College of Applied Medical Sciences, University of Hail, Hail, Saudi Arabia.

<sup>g</sup>Department of Biology, The Catholic University of America, Washington, DC 20064, USA.

### **Author list footnotes:**

\* **Corresponding author:** Andre Larochelle, M.D. Ph.D., National Heart, Lung and Blood  
Institute, National Institutes of Health, Bethesda, 9000 Rockville, Bethesda, MD 20892, USA.

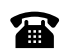

(301) 451-7139

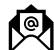

[larochea@nhlbi.nih.gov](mailto:larochea@nhlbi.nih.gov)

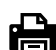

(301) 496-8396

### **This PDF file includes:**

Figures S1-S6

Tables S1-S3

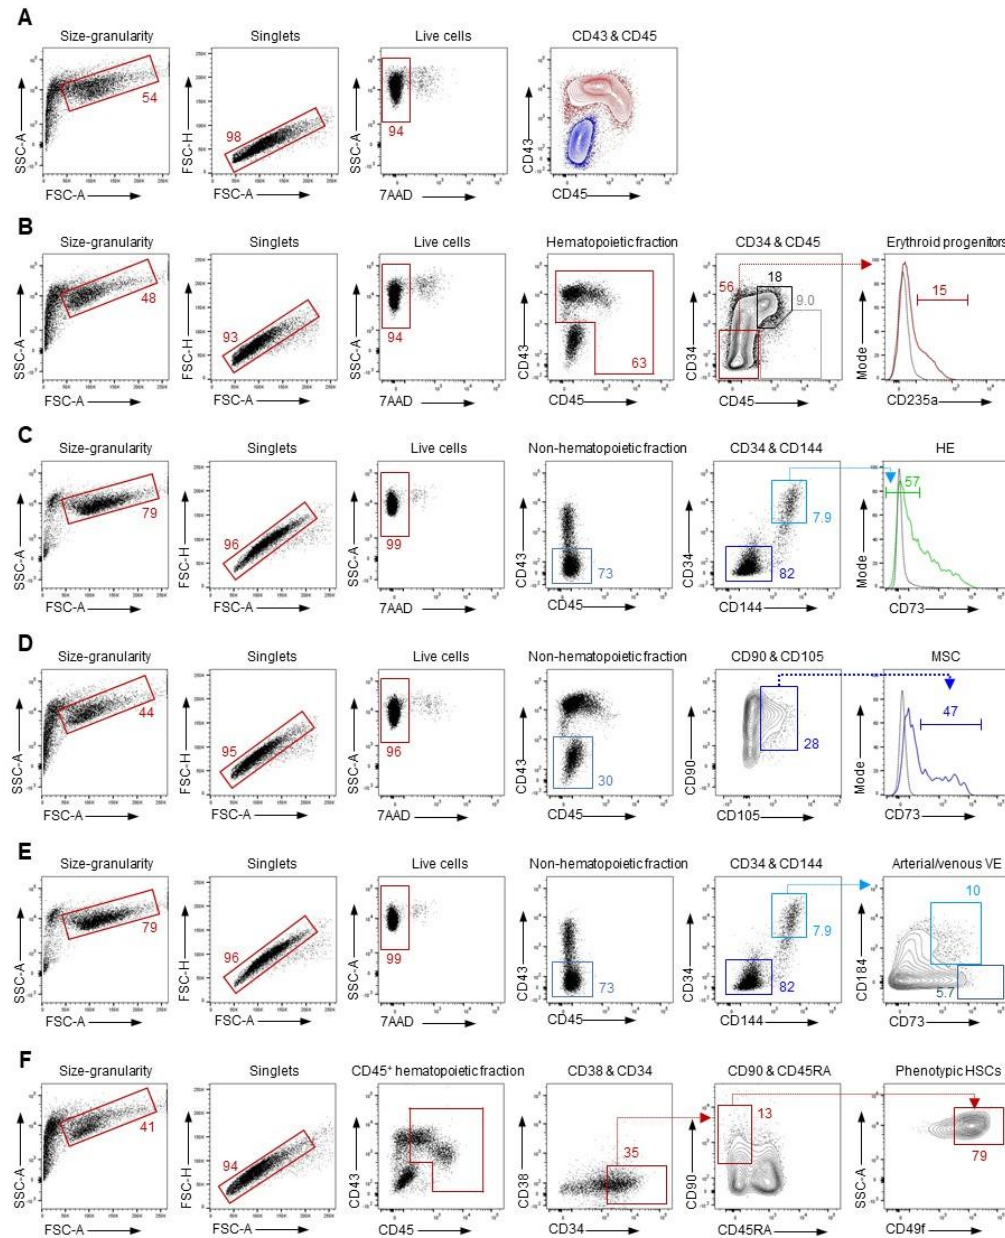

**Figure S1 | Complete gating strategies used for flow cytometry characterization of the cellular constituents arising during human iPSC differentiation with STEMdiff™ hematopoietic kit. (A)** Representative gating strategy for hematopoietic and non-hematopoietic fractions at day 12 of differentiation; associated with Fig. 1C. **(B)** Representative gating strategy for hematopoietic populations at day 10 of differentiation; associated with Fig. 2A. **(C)** Representative gating strategy for populations of mesenchymal cells, vascular endothelium (VE) and hemogenic endothelium (HE) at day 5 of differentiation; associated with Fig. 3A. **(D)** Representative gating strategy for populations of mesenchymal stromal cells (MSC) at day 10 of differentiation; associated with Fig. 3C. **(E)** Representative gating strategy for populations of arterial and venous VE at day 5 of differentiation; associated with Fig. 3F. **(F)** Representative gating strategy for populations of immunophenotypic HSCs at day 12 of differentiation; associated with Fig. S4A.

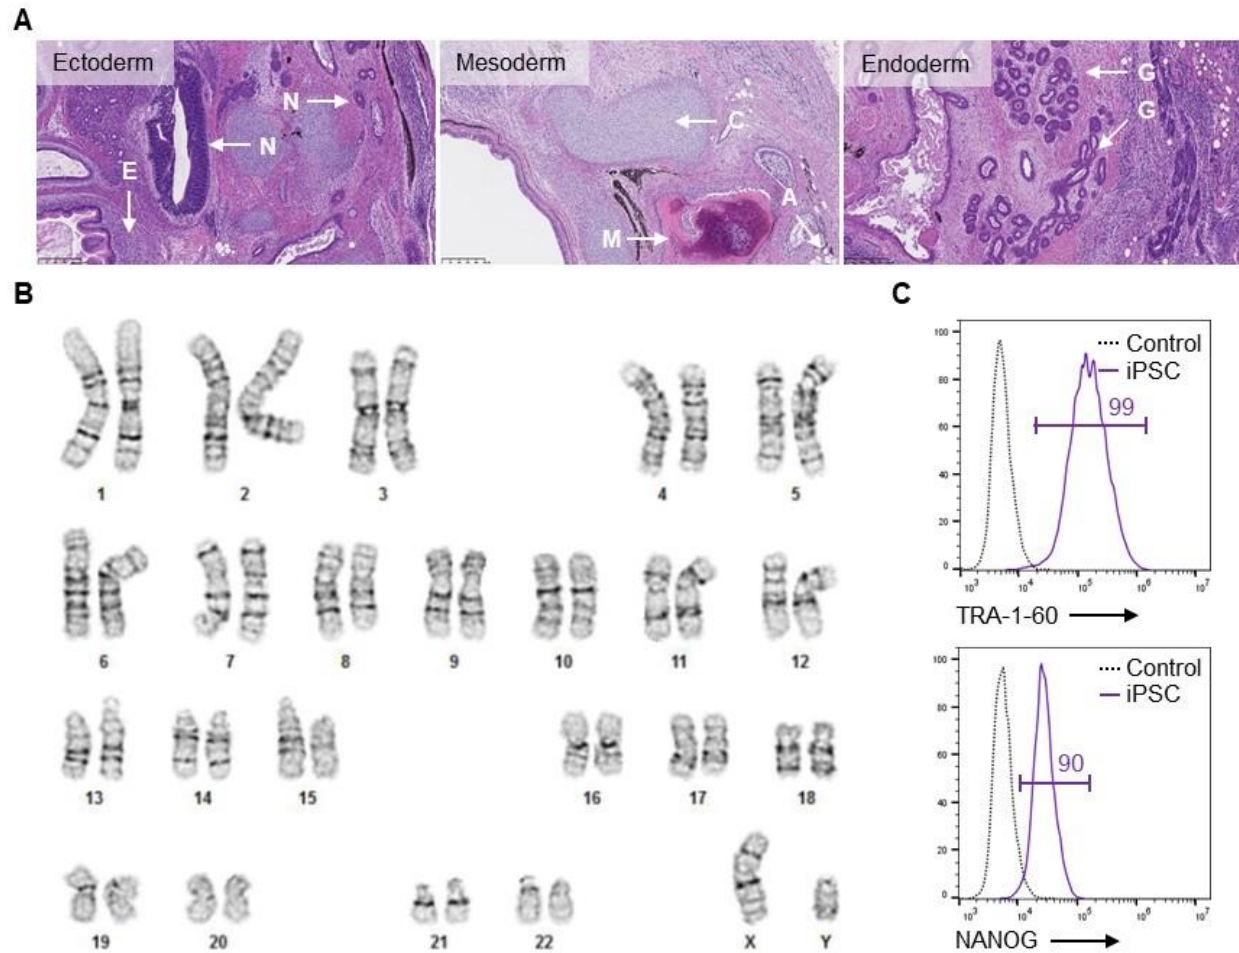

**Figure S2 | Characterization of MCND-TENS2 iPSC line.** (A) Hematoxylin and eosin stain of a teratoma from MCND-TENS2 iPSCs, displaying structures representative of ectoderm, mesoderm and endoderm. E, epidermal tissue; N, neural tissue; M, striated muscle; C, cartilage; A, adipose tissue; G, gut epithelial tissue. Scale bar = 250  $\mu$ m. (B) Cytogenetic analysis showing a normal karyotype (46, XY). (C) Flow cytometry analysis of iPSCs showing expression of pluripotency protein markers, TRA-1-60 and NANOG, compared to isotype controls.

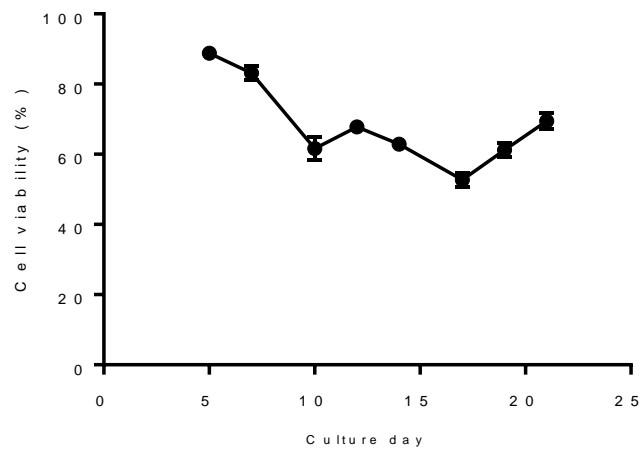

**Figure S3 | Cell viability during human iPSC differentiation with STEMdiff™ hematopoietic kit.** Total cell viability was measured by acridine orange (AO)/propidium iodide (PI) staining for each sample throughout differentiation. Results are shown as mean  $\pm$  SEM (n=8). Associated with Fig. 1E.

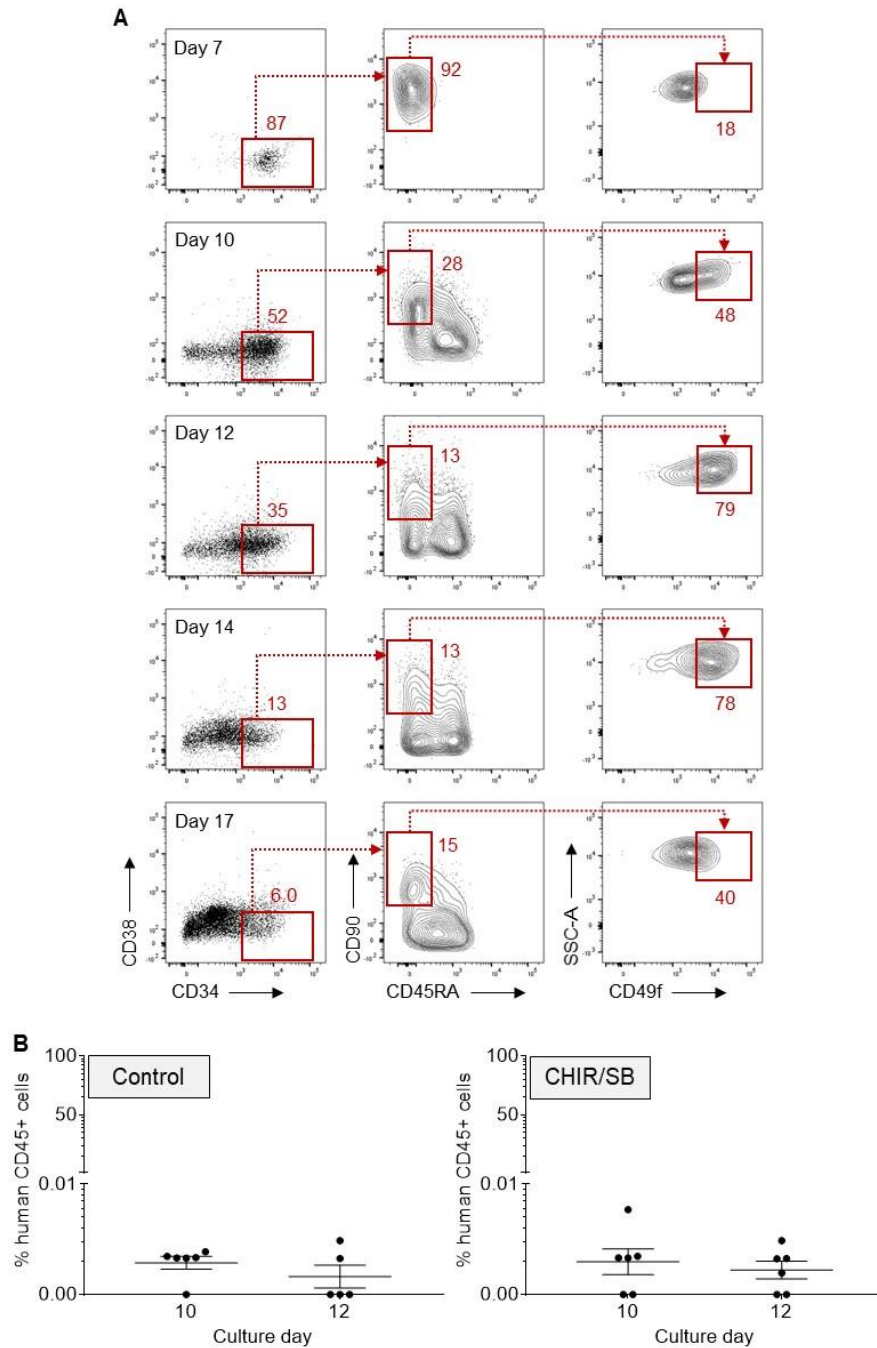

**Figure S4 | Production of immunophenotypic HSCs with no long-term engraftment potential during human iPSC differentiation with STEMdiff™ hematopoietic kit.** (A) Representative flow cytometry plots depicting  $CD34^+CD38^-CD45RA^-CD90^+CD49f^+$  cells in gated  $CD43^+CD45^+$  hematopoietic cells at various days of differentiation. The complete gating strategy is shown in Fig. S1F. (B) Human cell engraftment depicted as percentage of human CD45-expressing cells in the bone marrow of recipient NSG mice 16 weeks after transplantation of day 10 or 12 sorted  $CD43^+CD45^+$  hematopoietic cells derived from control (left panel, associated with Fig. 2E) or CHIR/SB-supplemented cultures (right panel, associated with Fig. 5G). Results are shown as mean  $\pm$  SEM; each dot represents an individual mouse (n= 5 to 6 mice per group).

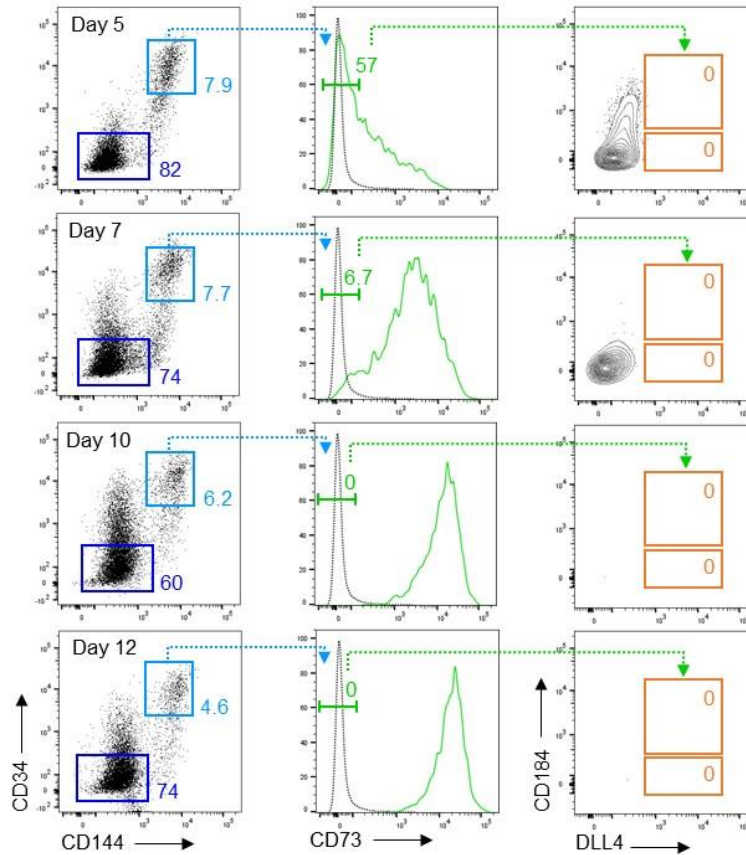

**Figure S5 | Limited hemogenic endothelium (HE) and arterial-type HE formation during human iPSC differentiation with STEMdiff™ hematopoietic kit.** Representative flow cytometry plots of CD34, CD144 (VE-cadherin), CD73, DLL4 and CD184 expression in gated CD43<sup>-</sup>CD45<sup>-</sup> non-hematopoietic cells at various days of differentiation. Gates shown include: CD144<sup>-</sup>CD34<sup>-</sup> mesenchymal cells (dark blue), CD144<sup>+</sup>CD34<sup>hi</sup> vascular endothelium (VE, light blue), CD144<sup>+</sup>CD34<sup>hi</sup>CD73<sup>-</sup> hemogenic endothelium (HE, green), and CD144<sup>+</sup>CD34<sup>hi</sup>CD73<sup>-</sup>DLL4<sup>+</sup>CD184<sup>+/-</sup> arterial-type HE. The complete gating strategy is shown in Fig. S1C.

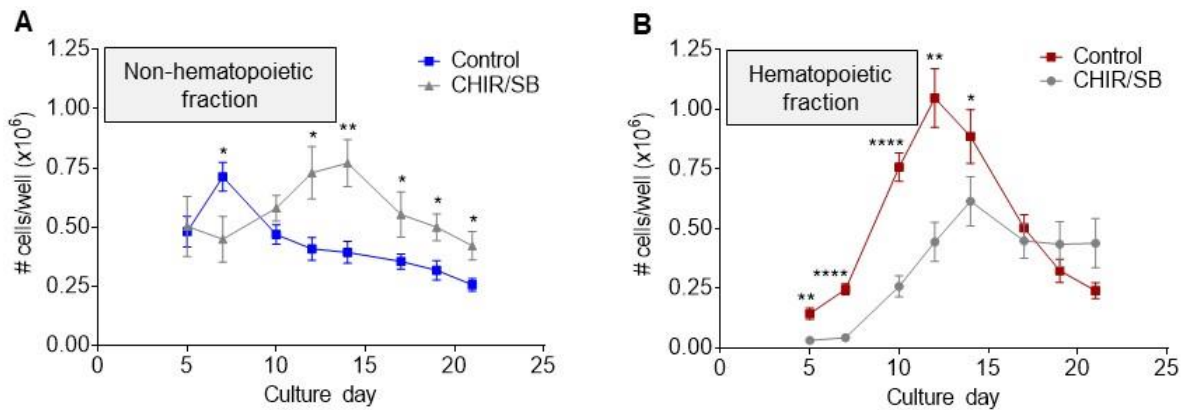

**Figure S6 | CHIR/SB molecules increase non-hematopoietic cells and decrease hematopoietic production during human iPSC differentiation with STEMdiff™ hematopoietic kit. (A)** Absolute numbers of CD43<sup>+</sup>CD45<sup>+</sup> hematopoietic cells arising from 20-35 iPSC clusters (one well of a 12-well plate) in control and CHIR/SB-supplemented cultures at various days of differentiation (n=6). Associated with Fig. 4A. **(B)** Absolute numbers of CD43<sup>-</sup>CD45<sup>-</sup> non-hematopoietic cells arising from 20-35 iPSC clusters (one well of a 12-well plate) in control and CHIR/SB-supplemented cultures at various days of differentiation (n=6). Associated with Fig. 5A. Results are displayed as mean  $\pm$  SEM. \*P<0.05, \*\*P < 0.01, \*\*\*\*P<0.0001, by two-way unpaired Student's t-tests comparing cell numbers in control vs CHIR/SB groups at each culture day.

**Table S1 | Human iPSC lines subjected to STEMdiff™ hematopoietic differentiation**

| <b>Cell line</b>                | <b>Type</b>        | <b>Starting material</b>                                     | <b>Reprogramming method</b> |
|---------------------------------|--------------------|--------------------------------------------------------------|-----------------------------|
| <b>MCND-TENS1</b>               | Normal control     | MPB CD34 <sup>+</sup> CD38 <sup>-</sup> cells <sup>(1)</sup> | Sendai virus                |
| <b>MCND-TENS2<sup>(2)</sup></b> | Normal control     | MPB CD34 <sup>+</sup> CD38 <sup>-</sup> cells <sup>(1)</sup> | Sendai virus                |
| <b>MCND-TENS3</b>               | Normal control     | MPB CD34 <sup>+</sup> CD38 <sup>-</sup> cells <sup>(1)</sup> | Sendai virus                |
| <b>MCND-S1</b>                  | Normal control     | MPB CD34 <sup>+</sup> cells <sup>(1)</sup>                   | Sendai virus                |
| <b>MCND-S3</b>                  | Normal control     | MPB CD34 <sup>+</sup> cells <sup>(1)</sup>                   | Sendai virus                |
| <b>NL-5</b>                     | Normal control     | Cord blood CD34 <sup>+</sup> cells                           | Episomal plasmid            |
| <b>ND-2</b>                     | Normal control     | Fibroblasts                                                  | Episomal plasmid            |
| <b>NC-1</b>                     | Normal control     | Fibroblasts                                                  | Episomal plasmid            |
| <b>NC-4</b>                     | Normal control     | Fibroblasts                                                  | Episomal plasmid            |
| <b>NC-5</b>                     | Normal control     | Fibroblasts                                                  | Episomal plasmid            |
| <b>113-7</b>                    | Normal control     | Fibroblasts                                                  | Episomal plasmid            |
| <b>DBA863-S13</b>               | DBA <sup>(3)</sup> | Mononuclear blood cells                                      | Sendai virus                |
| <b>DBA869-S1</b>                | DBA <sup>(3)</sup> | Mononuclear blood cells                                      | Sendai virus                |
| <b>DBA872-S1</b>                | DBA <sup>(3)</sup> | Mononuclear blood cells                                      | Sendai virus                |

<sup>(1)</sup> Derived from G-CSF mobilized peripheral blood (MPB)

<sup>(2)</sup> Used in this study

<sup>(3)</sup> Diamond Blackfan Anemia (DBA)



**Table S2 | Antibodies for flow cytometry analysis and FACS**

| <b>Antigen</b> | <b>Fluorochrome</b> | <b>Company/Catalogue #</b> | <b>Species</b>   | <b>μL/test</b> |
|----------------|---------------------|----------------------------|------------------|----------------|
| <b>CD34</b>    | PE-Cy7              | BD Pharmingen 560710       | Mouse anti-human | 10             |
| <b>CD34</b>    | PE                  | BD Pharmingen 555822       | Mouse anti-human | 20             |
| <b>CD38</b>    | APC                 | BD Pharmingen 555462       | Mouse anti-human | 20             |
| <b>CD43</b>    | BV711               | BD OptiBuild™ 743614       | Mouse anti-human | 5              |
| <b>CD43</b>    | FITC                | BD Pharmingen 555475       | Mouse anti-human | 20             |
| <b>CD45</b>    | V450                | BD Horizon 560367          | Mouse anti-human | 5              |
| <b>CD45RA</b>  | APC-H7              | BD Pharmingen 560674       | Mouse anti-human | 5              |
| <b>CD49f</b>   | PE-Cy5              | BD Pharmingen 551129       | Rat anti-human   | 20             |
| <b>CD73</b>    | PE                  | BD Pharmingen 550257       | Mouse anti-human | 20             |
| <b>CD73</b>    | FITC                | BD Pharmingen 561254       | Mouse anti-human | 5              |
| <b>CD90</b>    | PE-Cy7              | BD Pharmingen 561558       | Mouse anti-human | 5              |
| <b>CD105</b>   | AF647               | BD Pharmingen 561439       | Mouse anti-human | 5              |
| <b>CD144</b>   | BV605               | BD OptiBuild™ 743705       | Mouse anti-human | 5              |
| <b>CD184</b>   | PE-CF594            | BD Horizon 562389          | Mouse anti-human | 5              |
| <b>CD235a</b>  | FITC                | BioLegend 349104           | Mouse anti-human | 5              |
| <b>N/A</b>     | 7-AAD               | Thermofisher 00-6993-50    | N/A              | 5              |

**Table S3 | Taqman™ primers and probes**

| <b>Gene</b>   | <b>Assay or sequence</b>         | <b>Probe</b> |
|---------------|----------------------------------|--------------|
| <b>GAPDH</b>  | Life Technologies, Hs03929097_g1 | VIC          |
| <b>HoxA5</b>  | Life Technologies, Hs00430330_m1 | FAM          |
| <b>HoxA9</b>  | Life Technologies, Hs00365956_m1 | FAM          |
| <b>HoxA10</b> | Life Technologies, Hs00172012_m1 | FAM          |
